# Supplementary material for: Fitting Procedure to Reconstruct the Size Distribution and the Concentration of Silver Colloidal Nanoparticles from UV-Vis Spectra
Source: MDPI journal article supplement (doi:10.3390/nano12193302), 2022-09-22
Supplement: s1 [file s1]

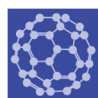

# Fitting Procedure to Reconstruct the Size Distribution and the Concentration of Silver Colloidal Nanoparticles from UV-Vis Spectra

Julio Car and Nikša Krstulović \*

Institute of Physics, Bijenička cesta 46, 10000 Zagreb, Croatia

\* Correspondence: niksak@ifs.hr

**Table S1.** Complete list of labels, types, shapes, measured and fitted diameters of colloidal silver nanoparticles for 33 different samples with references. For first 4 samples in column measured diameter, simple model diameters from [20] are reported.

| Sample Number | Label    | Type         | SPR Wave-length | Measured Diam-eter (nm) | Fitted Diame-ter (nm) | Expected Di-iameter (nm) | Ref. |
|---------------|----------|--------------|-----------------|-------------------------|-----------------------|--------------------------|------|
| 1             | Ag_1     | PLAL, 500 p  | 397             | (19.4±2.2)              | (19.7±1.2)            | (24.8±2.1)               | [20] |
| 2             | Ag_2     | PLAL, 1000 p | 395             | (18.3±1.6)              | (19.5±0.7)            | (23.0±2.1)               | [20] |
| 3             | Ag_3     | PLAL, 2000 p | 395             | (19.5±1.3)              | (18.8±0.4)            | (23.0±2.1)               | [20] |
| 4             | Ag_4     | PLAL, 3000 p | 395             | (19.3±1.0)              | (18.7±0.3)            | (23.0±2.1)               | [20] |
| 5             | Ag_5     | PLAL, 5000 p | 395             | (19.3±0.1)              | (18.9±0.4)            | (23.0±2.1)               | [20] |
| 6             | NanoX_1  | NanoXact     | 392             | (9.9±1.9)               | (23.5±0.2)            | (20.3±2.1)               | [22] |
| 7             | NanoX_2  | NanoXact     | 392             | (19.9±2.8)              | (23.8±0.2)            | (20.3±2.1)               | [22] |
| 8             | NanoX_3  | NanoXact     | 400             | (29±3)                  | (30.3±0.2)            | (27.6±2.1)               | [22] |
| 9             | NanoX_4  | NanoXact     | 414             | (41±3)                  | (43.7±0.3)            | (40.3±2.4)               | [22] |
| 10            | NanoX_5  | NanoXact     | 422             | (51±6)                  | (50.0±0.3)            | (47.6±2.5)               | [22] |
| 11            | NanoX_6  | NanoXact     | 430             | (59±5)                  | (58.9±0.4)            | (54.9±2.7)               | [22] |
| 12            | NanoX_7  | NanoXact     | 449             | (73±8)                  | (74.2±0.7)            | (72.2±3.3)               | [22] |
| 13            | NanoX_8  | NanoXact     | 455             | (79±7)                  | (85±1)                | (77.6±3.5)               | [22] |
| 14            | NanoX_9  | NanoXact     | 485             | (95±9)                  | (108.3±4.8)           | (104.9±4.5)              | [22] |
| 15            | NanoX_10 | NanoXact     | 486             | (193.7±21.2)            | (43±3)                | (105.8±4.6)              | [22] |
| 16            | BioP_1   | BioPure      | 400             | (5.2±0.9)               | (39.1±0.1)            | (27.6±2.1)               | [23] |
| 17            | BioP_2   | BioPure      | 390             | (9.9±1.9)               | (22.4±0.1)            | (18.5±2.0)               | [23] |
| 18            | BioP_3   | BioPure      | 391             | (19.9±2.8)              | (23.6±0.2)            | (19.4±2.0)               | [23] |
| 19            | BioP_4   | BioPure      | 400             | (28.8±3.2)              | (28.7±0.2)            | (27.6±2.1)               | [23] |
| 20            | BioP_5   | BioPure      | 412             | (39±4)                  | (42.2±0.3)            | (38.5±2.3)               | [23] |
| 21            | BioP_6   | BioPure      | 424             | (48±5)                  | (53.4±0.4)            | (49.4±2.6)               | [23] |
| 22            | BioP_7   | BioPure      | 426             | (59±6)                  | (53.7±0.3)            | (51.2±2.6)               | [23] |
| 23            | BioP_8   | BioPure      | 441             | (70.0±6.6)              | (68.6±0.5)            | (64.9±3.1)               | [23] |
| 24            | BioP_9   | BioPure      | 455             | (79.1±6.8)              | (85±1)                | (77.6±3.5)               | [23] |
| 25            | BioP_10  | BioPure      | 486             | (97±11)                 | (137±3)               | (105.8±4.6)              | [23] |
| 26            | EcoX_1   | Econix       | 401             | (6.3±1.3)               | (38.8±0.5)            | (28.5±2.1)               | [24] |
| 27            | EcoX_2   | Econix       | 397             | (24±3)                  | (24.4±0.2)            | (24.8±2.1)               | [24] |
| 28            | EcoX_3   | Econix       | 430             | (51±9)                  | (45±2)                | (54.9±2.7)               | [24] |
| 29            | EcoX_4   | Econix       | 465             | (77.5±7.0)              | (78±2)                | (86.7±3.8)               | [24] |
| 30            | EcoX_5   | Econix       | 503             | (106±14)                | (76±3)                | (121.3±5.2)              | [24] |

|    |        |                                |     |               |            |            |      |
|----|--------|--------------------------------|-----|---------------|------------|------------|------|
| 31 | AgIn_1 | PLAL                           | 400 | (26.3±0.4)    | (20.7±0.1) | (27.6±2.1) | [25] |
| 32 | AgIn_2 | reduction of AgNO <sub>3</sub> | 412 | (15±5) radius | (30±5)     | (39.1±2.3) | [26] |
| 33 | AgIn_3 | reduction of AgNO <sub>3</sub> | 443 | (34±5) radius | (80±6)     | (67.4±3.1) | [27] |

**Table S2.** Analyzed samples with fit of UV-Vis spectra and reconstruction of size distribution obtained by formulae (18) and (3d) respectively. TEM images are provided for NanoComposix samples.

| Sample                                                                                                                                        | Fit of UV-Vis Spectra                                                               | Reconstruction of Size Distribution                                                  |
|-----------------------------------------------------------------------------------------------------------------------------------------------|-------------------------------------------------------------------------------------|--------------------------------------------------------------------------------------|
| <p>Ag_1</p> <p><math>D_M=(19.4\pm2.2)</math><br/><math>D_{FIT}=(19.7\pm1.2)</math></p> <p>STEM=(-)<br/><math>S_{FIT}=(0.35\pm0.03)</math></p> | 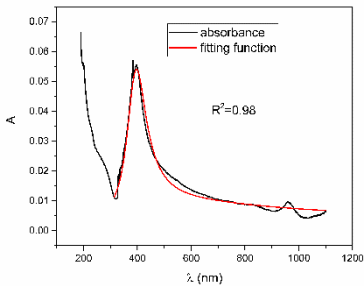   |    |
| <p>Ag_2</p> <p><math>D_M=(18.3\pm1.6)</math><br/><math>D_{FIT}=(19.5\pm0.7)</math></p> <p>STEM=(-)<br/><math>S_{FIT}=(0.34\pm0.02)</math></p> |  |  |
| <p>Ag_3</p> <p><math>D_M=(19.5\pm1.3)</math><br/><math>D_{FIT}=(18.8\pm0.4)</math></p> <p>STEM=(-)<br/><math>S_{FIT}=(0.33\pm0.01)</math></p> |  |  |

## Ag\_4

$$D_M=(19.3\pm1.0)$$

$$D_{FIT}=(18.7\pm0.3)$$

$$STEM=(-)$$

$$S_{FIT}=(0.322\pm0.008)$$

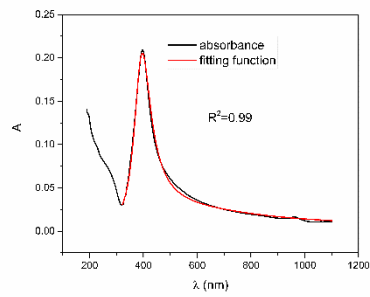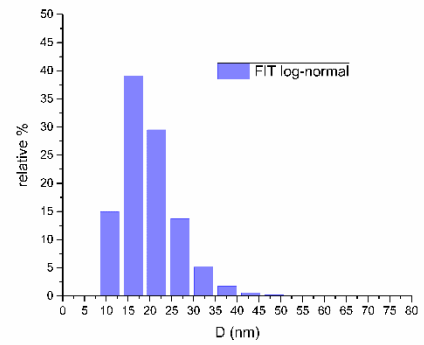

## Ag\_5

$$D_{AFM}=(19.3\pm0.1)$$

$$D_{FIT}=(18.9\pm0.4)$$

$$S_{AFM}=(0.41\pm0.03)$$

$$S_{FIT}=(0.309\pm0.005)$$

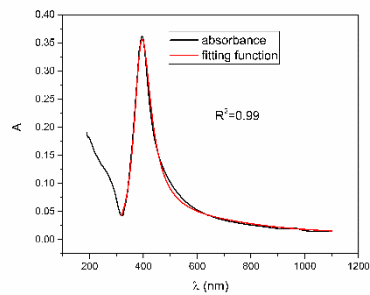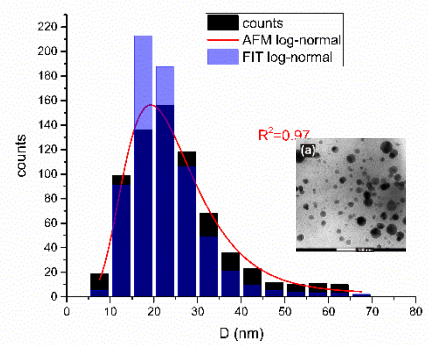

## NanoX\_1

$$D_{TEM}=(9.9\pm1.9)$$

$$D_{FIT}=(23.5\pm0.2)$$

$$STEM=(0.12\pm0.02)$$

$$S_{FIT}=(0.172\pm0.005)$$

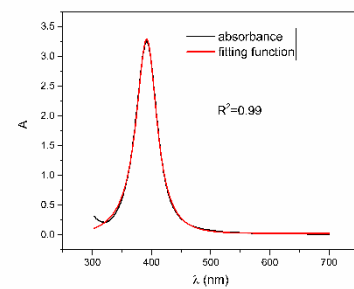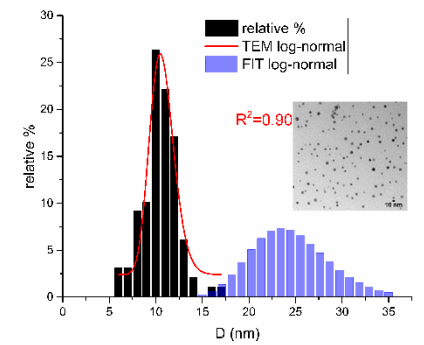

## NanoX\_2

$$D_{TEM}=(19.9\pm2.8)$$

$$D_{FIT}=(23.8\pm0.2)$$

$$STEM=(0.12\pm0.01)$$

$$S_{FIT}=(0.120\pm0.003)$$

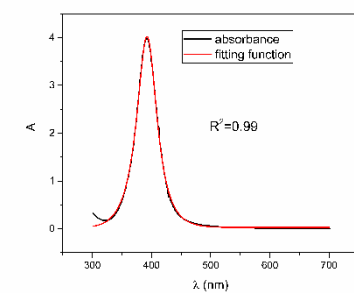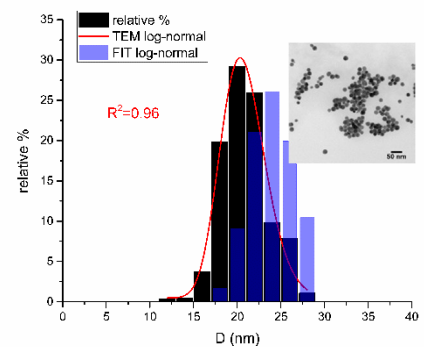

## NanoX\_3

$$D_{\text{TEM}}=(29\pm3)$$

$$D_{\text{FIT}}=(30.3\pm0.2)$$

$$S_{\text{TEM}}=(0.12\pm0.04)$$

$$S_{\text{FIT}}=(0.110\pm0.002)$$

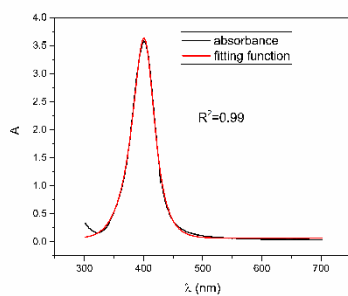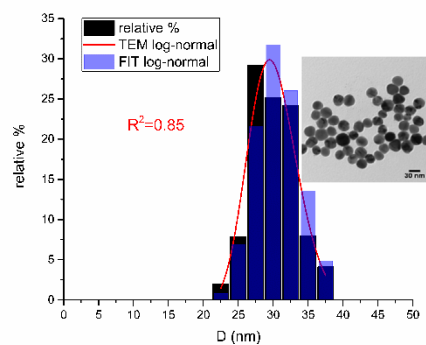

## NanoX\_4

$$D_{\text{TEM}}=(41\pm3)$$

$$D_{\text{FIT}}=(43.7\pm0.3)$$

$$S_{\text{TEM}}=(0.12\pm0.04)$$

$$S_{\text{FIT}}=(0.121\pm0.002)$$

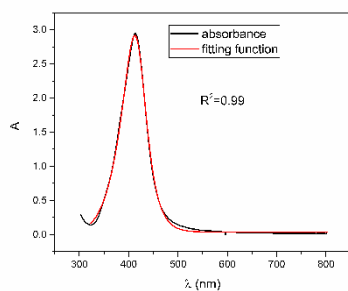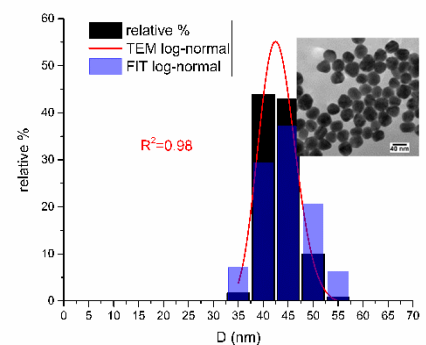

## NanoX\_5

$$D_{\text{TEM}}=(51\pm6)$$

$$D_{\text{FIT}}=(50.0\pm0.3)$$

$$S_{\text{TEM}}=(0.119\pm0.005)$$

$$S_{\text{FIT}}=(0.153\pm0.003)$$

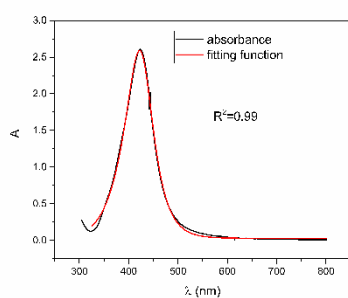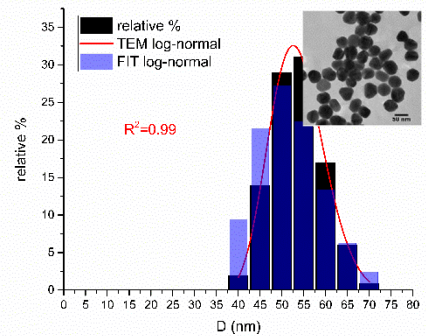

## NanoX\_6

$$D_{\text{TEM}}=(59\pm5)$$

$$D_{\text{FIT}}=(58.9\pm0.4)$$

$$S_{\text{TEM}}=(0.18\pm0.26)$$

$$S_{\text{FIT}}=(0.178\pm0.003)$$

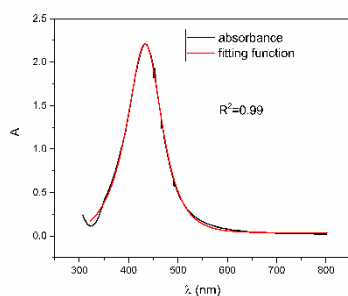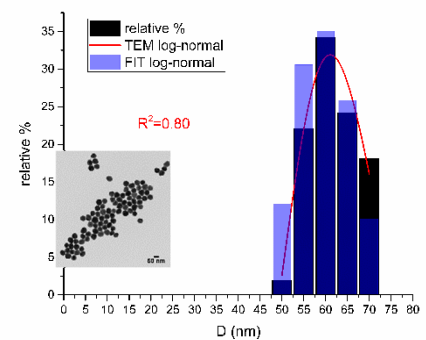

## NanoX\_7

$$D_{\text{TEM}}=(73\pm 8)$$
$$D_{\text{FIT}}=(74.2\pm 0.7)$$
$$\text{STEM}=(0.08\pm 0.01)$$
$$S_{\text{FIT}}=(0.221\pm 0.004)$$

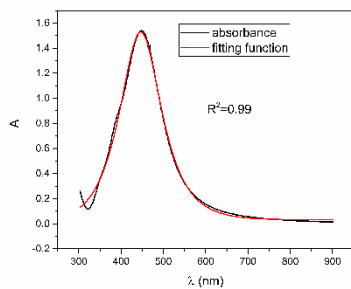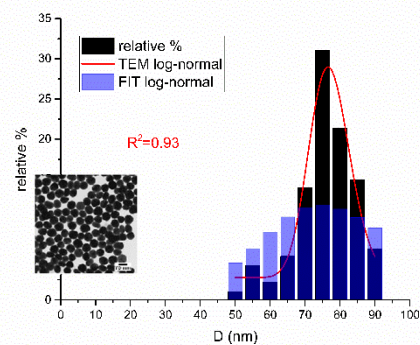

## NanoX\_8

$$D_{\text{TEM}}=(79\pm 7)$$
$$D_{\text{FIT}}=(85\pm 1)$$
$$\text{STEM}=(0.083\pm 0.007)$$
$$S_{\text{FIT}}=(0.211\pm 0.004)$$

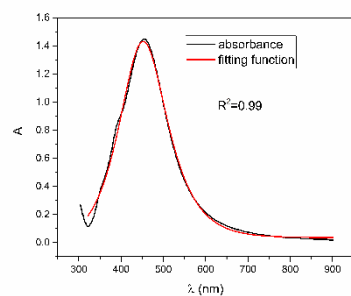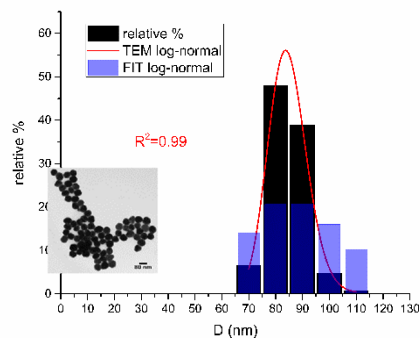

## NanoX\_9

$$D_{\text{TEM}}=(95\pm 9)$$
$$D_{\text{FIT}}=(108.3\pm 4.8)$$
$$\text{STEM}=(0.092\pm 0.004)$$
$$S_{\text{FIT}}=(0.159\pm 0.002)$$

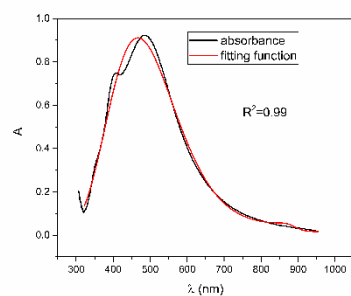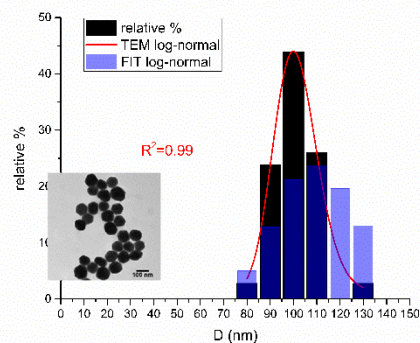

## NanoX\_10

$$D_{\text{TEM}}=(193.7\pm 21.2)$$
$$D_{\text{FIT}}=(43\pm 3)$$
$$\text{STEM}=(0.092\pm 0.004)$$
$$S_{\text{FIT}}=(0.30\pm 0.01)$$

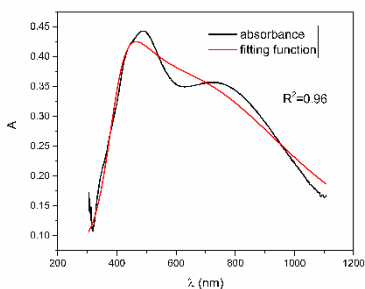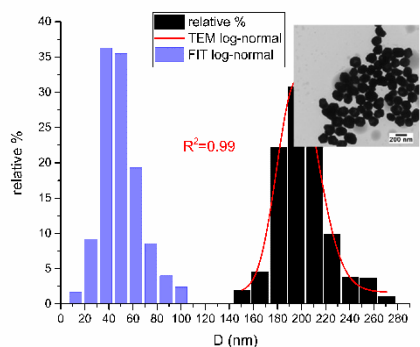

## BioP\_1

$$D_{\text{TEM}}=(5.2\pm0.9)$$

$$D_{\text{FIT}}=(39.1\pm0.1)$$

$$S_{\text{TEM}}=(0.13\pm0.01)$$

$$S_{\text{FIT}}=(0.201\pm0.002)$$

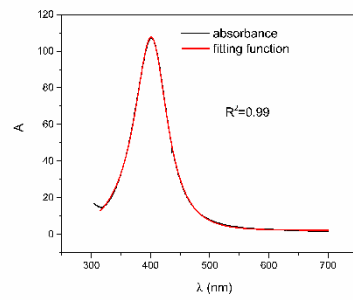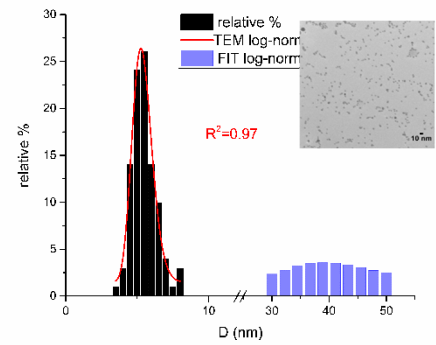

## BioP\_2

$$D_{\text{TEM}}=(9.9\pm1.9)$$

$$D_{\text{FIT}}=(22.4\pm0.1)$$

$$S_{\text{TEM}}=(0.12\pm0.02)$$

$$S_{\text{FIT}}=(0.144\pm0.002)$$

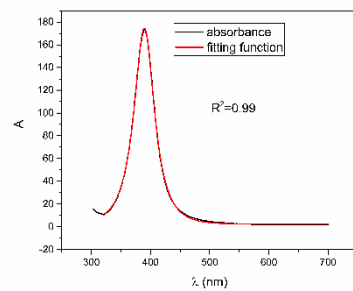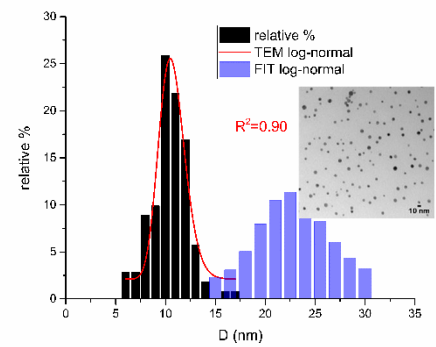

## BioP\_3

$$D_{\text{TEM}}=(19.9\pm2.8)$$

$$D_{\text{FIT}}=(23.6\pm0.2)$$

$$S_{\text{TEM}}=(0.12\pm0.01)$$

$$S_{\text{FIT}}=(0.110\pm0.002)$$

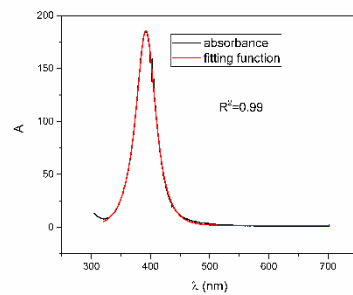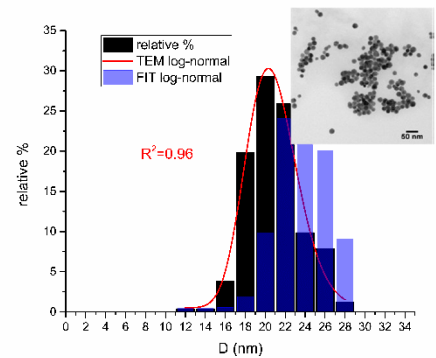

## BioP\_4

$$D_{\text{TEM}}=(28.8\pm3.2)$$

$$D_{\text{FIT}}=(28.7\pm0.2)$$

$$S_{\text{TEM}}=(0.12\pm0.04)$$

$$S_{\text{FIT}}=(0.111\pm0.002)$$

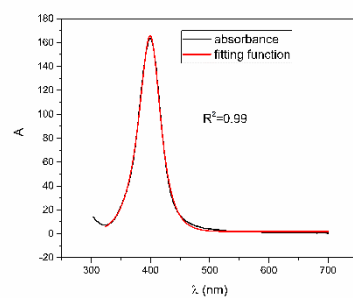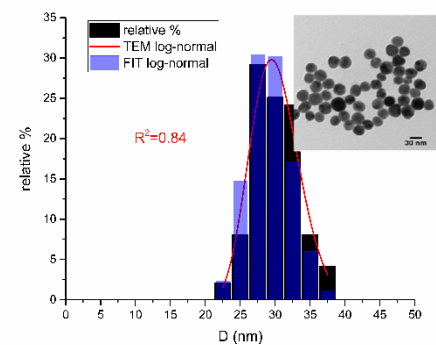

## BioP\_5

$$D_{\text{TEM}}=(39\pm4)$$
$$D_{\text{FIT}}=(42.2\pm0.3)$$
$$S_{\text{TEM}}=(0.09\pm0.01)$$
$$S_{\text{FIT}}=(0.115\pm0.002)$$

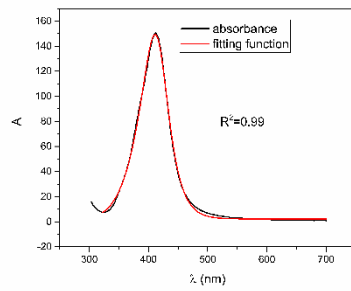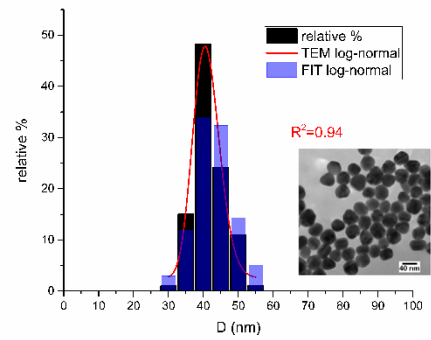

## BioP\_6

$$D_{\text{TEM}}=(48\pm5)$$
$$D_{\text{FIT}}=(53.4\pm0.4)$$
$$S_{\text{TEM}}=(0.22\pm0.22)$$
$$S_{\text{FIT}}=(0.151\pm0.003)$$

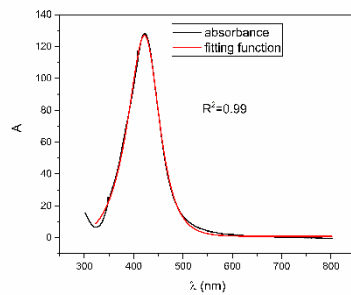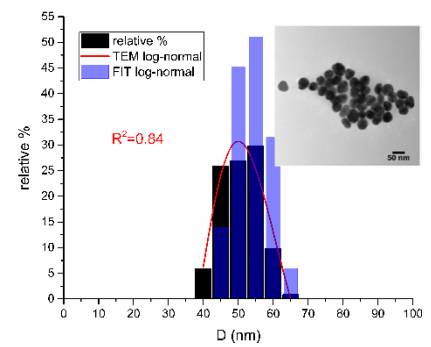

## BioP\_7

$$D_{\text{TEM}}=(59\pm6)$$
$$D_{\text{FIT}}=(53.7\pm0.3)$$
$$S_{\text{TEM}}=(0.094\pm0.007)$$
$$S_{\text{FIT}}=(0.193\pm0.002)$$

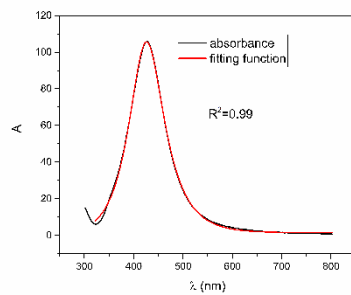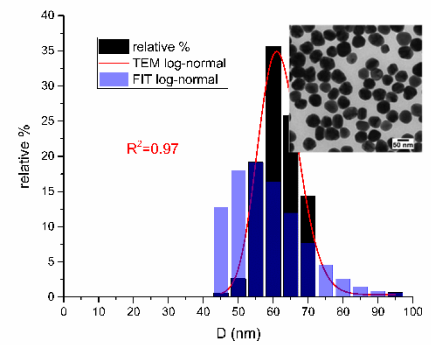

## BioP\_8

$$D_{\text{TEM}}=(70.0\pm6.6)$$
$$D_{\text{FIT}}=(68.6\pm0.5)$$
$$S_{\text{TEM}}=(0.03\pm0.01)$$
$$S_{\text{FIT}}=(0.208\pm0.003)$$

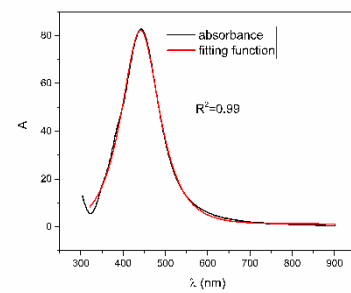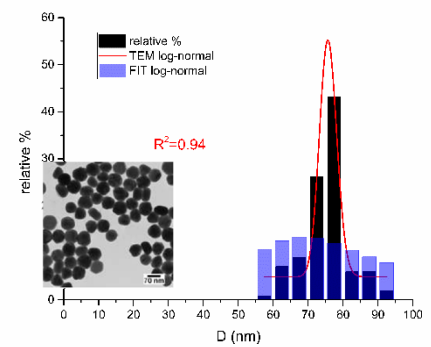

## BioP\_9

$$D_{\text{TEM}}=(79.1\pm 6.8)$$

$$D_{\text{FIT}}=(85\pm 1)$$

$$S_{\text{TEM}}=(0.083\pm 0.07)$$

$$S_{\text{FIT}}=(0.206\pm 0.004)$$

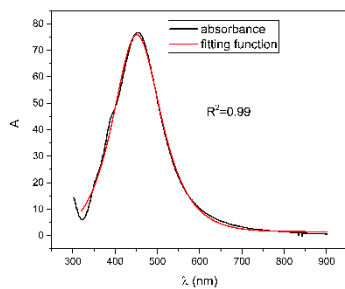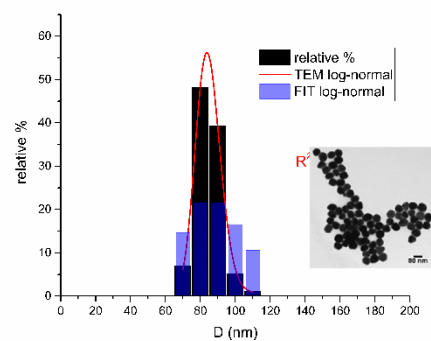

## BioP\_10

$$D_{\text{TEM}}=(97\pm 11)$$

$$D_{\text{FIT}}=(137\pm 3)$$

$$S_{\text{TEM}}=(0.093\pm 0.008)$$

$$S_{\text{FIT}}=(0.189\pm 0.003)$$

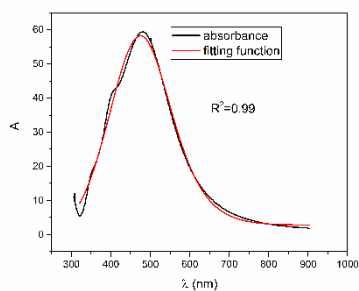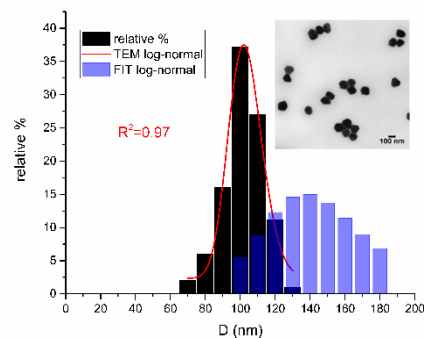

## EcoX\_1

$$D_{\text{TEM}}=(6.3\pm 1.3)$$

$$D_{\text{FIT}}=(38.8\pm 0.5)$$

$$S_{\text{TEM}}=(0.08\pm 0.01)$$

$$S_{\text{FIT}}=(0.172\pm 0.007)$$

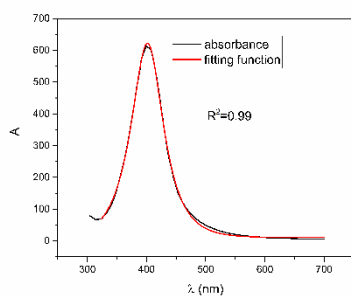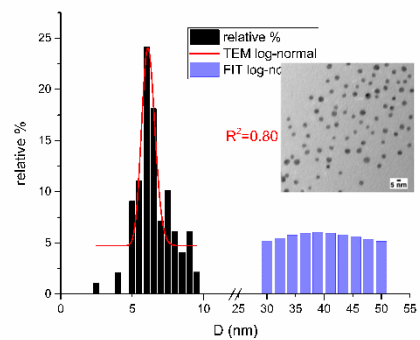

## EcoX\_2

$$D_{\text{TEM}}=(24\pm 3)$$

$$D_{\text{FIT}}=(24.4\pm 0.2)$$

$$S_{\text{TEM}}=(0.12\pm 0.01)$$

$$S_{\text{FIT}}=(0.141\pm 0.006)$$

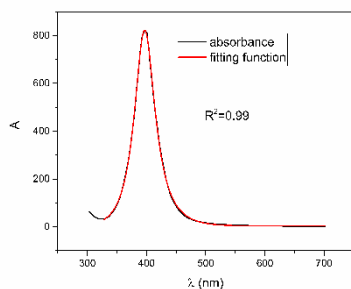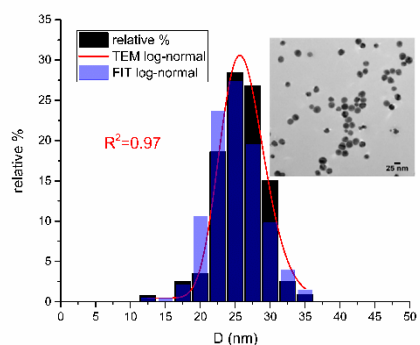



## EcoX\_3

$$D_{\text{TEM}}=(51\pm 9)$$

$$D_{\text{FIT}}=(45\pm 2)$$

$$\text{STEM}=(0.106\pm 0.008)$$

$$\text{SFIT}=(0.39\pm 0.06)$$

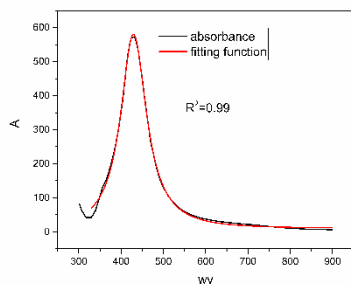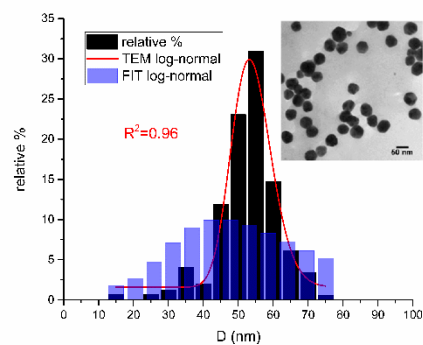

## EcoX\_4

$$D_{\text{TEM}}=(77.5\pm 7.0)$$

$$D_{\text{FIT}}=(78\pm 2)$$

$$\text{STEM}=(0.077\pm 0.005)$$

$$\text{SFIT}=(0.27\pm 0.02)$$

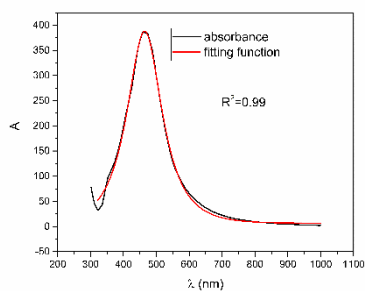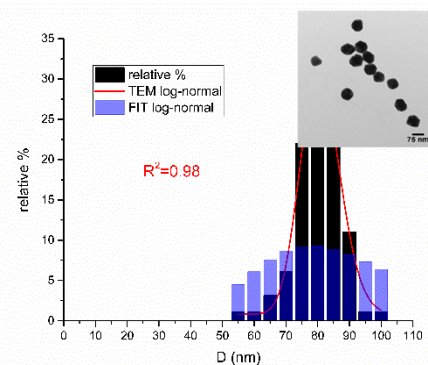

## EcoX\_5

$$D_{\text{TEM}}=(106\pm 14)$$

$$D_{\text{FIT}}=(76\pm 3)$$

$$\text{STEM}=(0.12\pm 0.02)$$

$$\text{SFIT}=(0.51\pm 0.01)$$

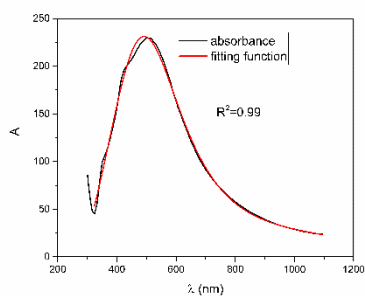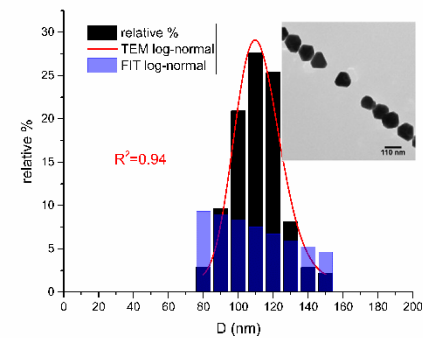

## AgIn\_1

$$D_{\text{TEM}}=(26.3\pm 0.4)$$

$$D_{\text{FIT}}=(20.7\pm 0.1)$$

$$\text{STEM}=(0.30\pm 0.01)$$

$$\text{SFIT}=(0.318\pm 0.002)$$

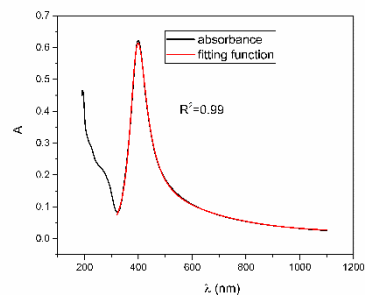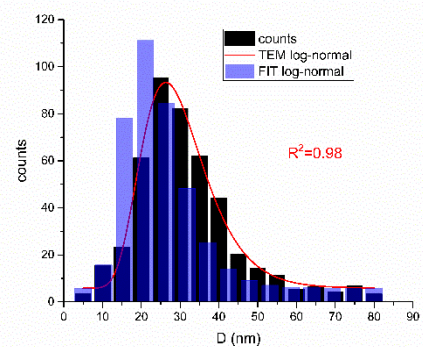

## AgIn\_2

$$R_{TEM}=(15\pm 5)$$

$$D_{FIT}=(30\pm 5)$$

$$STEM=()$$

$$SFIT=(0.43\pm 0.03)$$

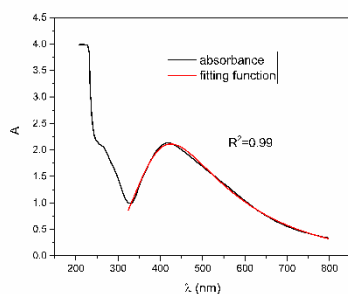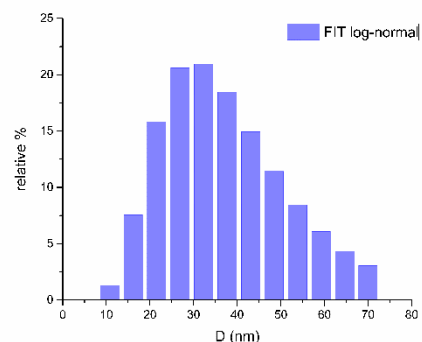

## AgIn\_3

$$R_{TEM}=(34\pm 5)$$

$$D_{FIT}=(80\pm 6)$$

$$STEM=()$$

$$SFIT=(0.52\pm 0.06)$$

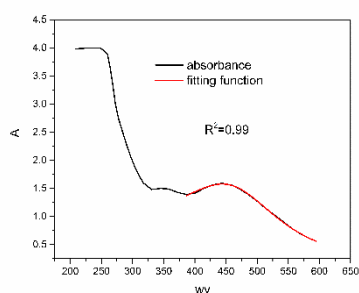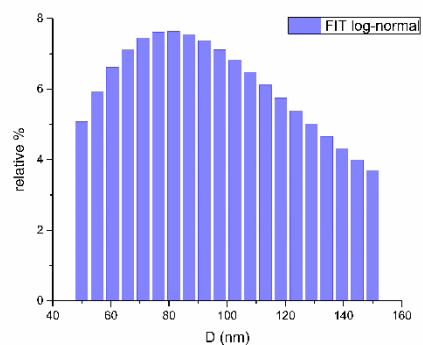

**Table S3.** Labels, types, shapes, reported and fitted concentrations for colloidal solutions of nanoparticles with corresponding error.

| Sample no. | Label   | Type         | Shape     | Reported Concentration ( $\cdot 10^{10} \text{ cm}^{-3}$ ) | Fitted Concentration with out $r(D, \lambda)$ ( $\cdot 10^{10} \text{ cm}^{-3}$ ) | Fitted Concentration with $r(D, \lambda)$ ( $\cdot 10^{10} \text{ cm}^{-3}$ ) |
|------------|---------|--------------|-----------|------------------------------------------------------------|-----------------------------------------------------------------------------------|-------------------------------------------------------------------------------|
| 1          | Ag_1    | PLAL, 500 p  | spherical | 2.0                                                        | (2.3 $\pm$ 0.4)                                                                   | (1.9 $\pm$ 0.3)                                                               |
| 2          | Ag_2    | PLAL, 1000 p | spherical | 3.4                                                        | (3.4 $\pm$ 0.3)                                                                   | (2.9 $\pm$ 0.3)                                                               |
| 3          | Ag_3    | PLAL, 2000 p | spherical | 4.7                                                        | (6.2 $\pm$ 0.3)                                                                   | (5.2 $\pm$ 0.3)                                                               |
| 4          | Ag_4    | PLAL, 3000 p | spherical | 6.7                                                        | (8.6 $\pm$ 0.4)                                                                   | (7.4 $\pm$ 0.4)                                                               |
| 5          | Ag_5    | PLAL, 5000 p | spherical | 10.4                                                       | (11.9 $\pm$ 0.7)                                                                  | (10.4 $\pm$ 0.7)                                                              |
| 6          | NanoX_1 | NanoXact     | spherical | 370                                                        | (29.2 $\pm$ 0.7)                                                                  | (28.0 $\pm$ 0.7)                                                              |
| 7          | NanoX_2 | NanoXact     | spherical | 52                                                         | (30.4 $\pm$ 0.8)                                                                  | (29.8 $\pm$ 0.8)                                                              |
| 8          | NanoX_3 | NanoXact     | spherical | 16                                                         | (14.0 $\pm$ 0.3)                                                                  | (13.7 $\pm$ 0.3)                                                              |
| 9          | NanoX_4 | NanoXact     | spherical | 5.7                                                        | (4.68 $\pm$ 0.09)                                                                 | (4.58 $\pm$ 0.09)                                                             |
| 10         | NanoX_5 | NanoXact     | spherical | 3                                                          | (3.16 $\pm$ 0.06)                                                                 | (3.06 $\pm$ 0.06)                                                             |
| 11         | NanoX_6 | NanoXact     | spherical | 1.9                                                        | (1.96 $\pm$ 0.04)                                                                 | (1.87 $\pm$ 0.04)                                                             |
| 12         | NanoX_7 | NanoXact     | spherical | 0.95                                                       | (1.01 $\pm$ 0.03)                                                                 | (0.94 $\pm$ 0.03)                                                             |

|    |          |                                |           |        |             |             |
|----|----------|--------------------------------|-----------|--------|-------------|-------------|
| 13 | NanoX_8  | NanoXact                       | spherical | 0.76   | (0.66±0.02) | (0.62±0.02) |
| 14 | NanoX_9  | NanoXact                       | spherical | 0.43   | (0.30±0.04) | (0.29±0.04) |
| 15 | NanoX_10 | NanoXact                       | spherical | 0.055  | (6±1)       | (5±1)       |
| 16 | BioP_1   | BioPure                        | spherical | 120000 | (301±2)     | (283±2)     |
| 17 | BioP_2   | BioPure                        | spherical | 20000  | (1810±20)   | (1750±20)   |
| 18 | BioP_3   | BioPure                        | spherical | 2400   | (1460±40)   | (1440±40)   |
| 19 | BioP_4   | BioPure                        | spherical | 770    | (790±20)    | (780±20)    |
| 20 | BioP_5   | BioPure                        | spherical | 320    | (264±6)     | (259±6)     |
| 21 | BioP_6   | BioPure                        | spherical | 180    | (134±3)     | (129±3)     |
| 22 | BioP_7   | BioPure                        | spherical | 92     | (130±2)     | (123±2)     |
| 23 | BioP_8   | BioPure                        | spherical | 54     | (61±1)      | (57±1)      |
| 24 | BioP_9   | BioPure                        | spherical | 40     | (34±1)      | (32±1)      |
| 25 | BioP_10  | BioPure                        | spherical | 21     | (8.0±0.5)   | (7.6±0.5)   |
| 26 | EcoX_1   | Econix                         | spherical | 370000 | (1640±60)   | (1570±60)   |
| 27 | EcoX_2   | Econix                         | spherical | 6500   | (6800±200)  | (6600±200)  |
| 28 | EcoX_3   | Econix                         | spherical | 760    | (1300±200)  | (1100±100)  |
| 29 | EcoX_4   | Econix                         | spherical | 200    | (220±20)    | (200±20)    |
| 30 | EcoX_5   | Econix                         | spherical | 83     | (330±30)    | (220±30)    |
| 31 | AgIn_1   | PLAL                           | spherical | 1      | (23.9±0.3)  | (20.5±0.3)  |
| 32 | AgIn_2   | reduction of AgNO <sub>3</sub> | spherical | -      | -           | -           |
| 33 | AgIn_3   | reduction of AgNO <sub>3</sub> | spherical | -      | -           | -           |

#### S4. Procedure for Size Distribution Reconstruction

Size distribution is reconstructed based on 2 fitted parameters: mode diameter  $D_m$  and standard deviation of size distribution  $s$  since log-normal distribution function is defined by only those 2 parameters. As it can be seen from the main model equation (18) in manuscript, log-normal size distribution is incorporated in fitting function via concentration of nanoparticles. According to equations (3c) and (3d), log-normal distribution function is fully defined by parameters  $D_m$  (peak of distribution) and  $s$  (width of distribution). Parameter  $P$  which appears in both (3c) and (3d) represents the integral under log-normal distribution function and it is irrelevant because it cancels out in volume concentration definition (3b) which is why it's not present in fitting function. However, reconstruction of the size distribution according to (3d) doesn't depend on parameter  $P$  since only relative percentage of nanoparticles vs diameter is of interest. It means that following formula for relative percentage can be used:

$$r_i\% = \frac{f(D_i)}{\sum_{i=1}^n f(D_i)} \cdot 100\% = \frac{e^{-\frac{\left(\ln\left(\frac{D_i}{D_m}\right)\right)^2}{2s^2}}}{\sum_{i=1}^n e^{-\frac{\left(\ln\left(\frac{D_i}{D_m}\right)\right)^2}{2s^2}}} \cdot 100\% \quad (S1)$$

where  $n$  is number of intervals representing column bars in size distribution histogram and  $D_i$  is given as  $D_i = D_{\min} + i \cdot \Delta D$  in range  $[D_{\min}, D_{\max}]$ . Diameter interval is given by  $\Delta D = \frac{D_{\max} - D_{\min}}{n}$ . Also, following identity of log-normal distribution function can be shown:

$$\int_0^\infty e^{-\frac{\left(\ln\left(\frac{D}{D_m}\right)\right)^2}{2s^2}} dD = \sqrt{2\pi}sD_m e^{\frac{s^2}{2}} \quad (S2)$$

Using property of log-normal function for condition  $f(D_{\min}) = f(D_{\max})$ , one obtains

$$D_{\min} \cdot D_{\max} = D_m^2 \quad (S3)$$

Here,  $D_{\min}$  and  $D_{\max}$  aren't minimum and maximum diameters of nanoparticles in colloidal solution since those cannot be deduced from fitting procedure. Values  $D_{\min}$  and  $D_{\max}$  represent boundary diameters for which size distribution is reconstructed because log-normal function is defined within the range  $[0, +\infty]$ . Using definition of  $\Delta D$  and (S3), one can find expressions for  $D_{\min, \max}$  which equal:

$$D_{\max} = \frac{1}{2} \left( n\Delta D + \sqrt{n^2\Delta D^2 + 4D_m^2} \right) \quad (S4)$$

$$D_{\min} = \frac{2D_m^2}{n\Delta D + \sqrt{n^2\Delta D^2 + 4D_m^2}} \quad (S5)$$

In summary, for defined  $\Delta D$  and  $n$  one can find  $D_{\min}$  and  $D_{\max}$  and use above procedure to reconstruct size distribution of colloidal nanoparticles using (S1).
